# Supplementary material for: Synthesis routes of CeO2 nanoparticles dedicated to organophosphorus degradation: a benchmark
Source: Royal Society of Chemistry journal article supplement (doi:10.1039/c9ce01898k), 2020-01-01
Supplement: c9ce01898k1.pdf [file c9ce01898k1.pdf]

Benchmarking of performance, costs and productivity

| Best Sample     | $t_{1/2}$ (min) | Production time (h/g) | costs (€/g) |
|-----------------|-----------------|-----------------------|-------------|
| <b>Φ-NTO</b>    | 53              | 47,00                 | 986,21 €    |
| <b>X-NO</b>     | 64              | 0,52                  | 6,61 €      |
| <b>X-NR*</b>    | 31              | 1,15                  | 14,62 €     |
| <b>Xhv-NTO*</b> | 119             | 2,08                  | 21,73 €     |

Benchmarking of performance, costs and productivity

| Best Sample     | $k \cdot 10^{-3}$ (1/min) | Productivity (g/Day) | 1/costs (g /k€) | hourly production rate (mg/h) |
|-----------------|---------------------------|----------------------|-----------------|-------------------------------|
| <b>Φ-NTO</b>    | 13,08                     | 0,25                 | 1,01            | 21                            |
| <b>X-NO</b>     | 10,83                     | 34,33                | 151,20          | 1925                          |
| <b>X-NR*</b>    | 22,36                     | 15,50                | 68,41           | 873                           |
| <b>Xhv-NTO*</b> | 5,82                      | 13,10                | 46,02           | 481                           |

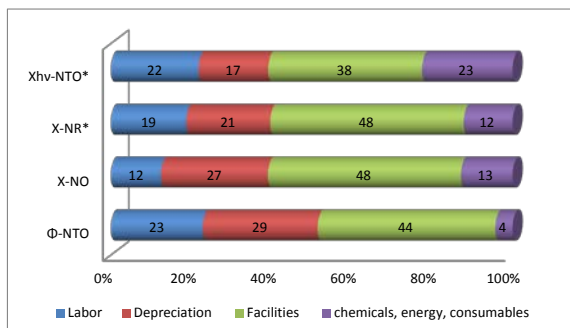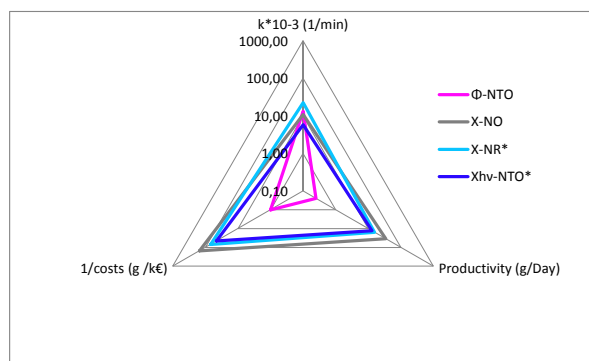

| For one Batch   | Labor    | Depreciation | Facilities | chemicals, energy, consumables |
|-----------------|----------|--------------|------------|--------------------------------|
| <b>Φ-NTO</b>    | 450,84 € | 564,36 €     | 872,73 €   | 84,48 €                        |
| <b>X-NO</b>     | 84,94 €  | 181,37 €     | 327,27 €   | 87,63 €                        |
| <b>X-NR*</b>    | 84,94 €  | 94,89 €      | 218,18 €   | 55,12 €                        |
| <b>Xhv-NTO*</b> | 124,14 € | 98,76 €      | 218,18 €   | 128,29 €                       |

  

| For one gram    | Labor    | Depreciation | Facilities | chemicals, energy, consumable | Total    |
|-----------------|----------|--------------|------------|-------------------------------|----------|
| <b>Φ-NTO</b>    | 225,42 € | 282,18 €     | 436,36 €   | 42,24 €                       | 986,21 € |
| <b>X-NO</b>     | 0,82 €   | 1,76 €       | 3,18 €     | 0,85 €                        | 6,61 €   |
| <b>X-NR*</b>    | 2,74 €   | 3,06 €       | 7,04 €     | 1,78 €                        | 14,62 €  |
| <b>Xhv-NTO*</b> | 4,74 €   | 3,77 €       | 8,33 €     | 4,90 €                        | 21,73 €  |

| For one Batch   | Labor | Depreciation | Facilities | chemicals, energy, consumables |
|-----------------|-------|--------------|------------|--------------------------------|
| <b>Φ-NTO</b>    | 23    | 29           | 44         | 4                              |
| <b>X-NO</b>     | 12    | 27           | 48         | 13                             |
| <b>X-NR*</b>    | 19    | 21           | 48         | 12                             |
| <b>Xhv-NTO*</b> | 22    | 17           | 38         | 23                             |

|                                                                                                                                                                                                                                                                                                                                                                                                                                                                                                                                                                                                                                                                                                                                                                                                                                                                                                                                                                                                                                                                                                                                                |                                                                   |          |                                                                                          |       |                                                 |      |                                                                                                                               |    |
|------------------------------------------------------------------------------------------------------------------------------------------------------------------------------------------------------------------------------------------------------------------------------------------------------------------------------------------------------------------------------------------------------------------------------------------------------------------------------------------------------------------------------------------------------------------------------------------------------------------------------------------------------------------------------------------------------------------------------------------------------------------------------------------------------------------------------------------------------------------------------------------------------------------------------------------------------------------------------------------------------------------------------------------------------------------------------------------------------------------------------------------------|-------------------------------------------------------------------|----------|------------------------------------------------------------------------------------------|-------|-------------------------------------------------|------|-------------------------------------------------------------------------------------------------------------------------------|----|
| <p><b>The following table is a tool developed to assess the production costs of one production batch of nanoparticles, and then infer the production costs for 1g of dried nanoparticles</b></p> <p>The time duration to produce one batch is an important parameter since it will defined the manpower costs, as well as equipment depreciation. We assume <b>5 years for the depreciation of the investments (standard value)</b></p> <p>In the following table, the time duration is divided in two parts: (i) the working time of a technician (Manpower) and (ii) the equipment operating times. The manpower is used to compute the salary cost, the equipment operating times is used to compute the depreciation of the investments (equipments) and the electricity costs. Moreover, an immobilisation of the equipment is used to compute the rental cost of the facilities</p> <p><b>Rental of facilities:</b> 30 m<sup>2</sup> of experimental room including a fume hood, an office of 10 m<sup>2</sup>, the rental expenses (processing of the chemical waste, fluids consumption, cleaning and security, air conditioning).</p> | Hourly costs of a qualified technicians including taxes [€/hours] | 26,14 €  | Wage bill (Annually) including taxes for a French qualified technician, median value [€] | 42000 | Legal working time per years [hours]            | 1607 | For the sake of comparing the different methods, we will use the same hourly costs for all the synthesis (i.e. french values) |    |
|                                                                                                                                                                                                                                                                                                                                                                                                                                                                                                                                                                                                                                                                                                                                                                                                                                                                                                                                                                                                                                                                                                                                                | Electricity cost (France, VAT excluded) [€ / kWh]                 | 0,12 €   |                                                                                          |       |                                                 |      |                                                                                                                               |    |
|                                                                                                                                                                                                                                                                                                                                                                                                                                                                                                                                                                                                                                                                                                                                                                                                                                                                                                                                                                                                                                                                                                                                                | Usefull Machine time on 5 years (for depreciation) [hours]        | 8800     | Deprecisation period [year]                                                              | 5     | Working weeks in a year                         | 44   | Machine time per week [Hours]                                                                                                 | 40 |
|                                                                                                                                                                                                                                                                                                                                                                                                                                                                                                                                                                                                                                                                                                                                                                                                                                                                                                                                                                                                                                                                                                                                                | Rental cost per working day [€/day]                               | 109,09 € | Facilities rental [€/years]                                                              | 24000 | Working days in a year = Working Weeks x 5 Days |      | 220                                                                                                                           |    |

| Pulsed Laser Ablation In Liquids                                                                                                                                                                                                                   |                  |                                   | Comments                                                                                                                                                                                     |                                              |                                                    |                                                        |                                                                                                                       |
|----------------------------------------------------------------------------------------------------------------------------------------------------------------------------------------------------------------------------------------------------|------------------|-----------------------------------|----------------------------------------------------------------------------------------------------------------------------------------------------------------------------------------------|----------------------------------------------|----------------------------------------------------|--------------------------------------------------------|-----------------------------------------------------------------------------------------------------------------------|
| Productivity, i.e. weight in grams of dried powder produced in one batch                                                                                                                                                                           | 2                | [g/batch]                         | 18MΩ water produced with a purification units<br>For PLAL synthesis, the critical step is the ablation step.<br>Preparation and purification can be performed in parallel on an other batch. |                                              |                                                    |                                                        |                                                                                                                       |
| Volume of purified water (18MΩ) used to produce one batch                                                                                                                                                                                          | 20,4             | [L]                               |                                                                                                                                                                                              |                                              |                                                    |                                                        |                                                                                                                       |
| Immobilisation of the equipments for one batch                                                                                                                                                                                                     | 8                | [Days]                            |                                                                                                                                                                                              |                                              |                                                    |                                                        |                                                                                                                       |
| Product costs for one batch (chemicals...)                                                                                                                                                                                                         | 10,64 €          | [€] VAT excluded                  |                                                                                                                                                                                              |                                              |                                                    |                                                        |                                                                                                                       |
| Consumable (chemicals excluded)                                                                                                                                                                                                                    | 25,00 €          |                                   | Fluidic system (3D printing + tubes) ~ 25€                                                                                                                                                   |                                              |                                                    |                                                        |                                                                                                                       |
| Time duration: Manpower (time spent by an researcher/technician) and machine time are separated. As an exemple, for PLAL, the target preparation involves 1H of work for the pellet preparation, even if the time duration of the annealing is 24H | Manpower [Hours] | Equipment operating times [Hours] | Power consumption of the machines [W]                                                                                                                                                        | Electricity costs per batch [€] VAT excluded | Investment Cost of the equipments [€] VAT excluded | Equipments depreciation for one batch [€] VAT excluded | Comments                                                                                                              |
| Synthesis preparation                                                                                                                                                                                                                              | 1                | 24                                | 4500                                                                                                                                                                                         | 13,05 €                                      | 16000                                              | 43,64 €                                                | Target preparation, Oven (4500 W, 16000€)                                                                             |
| Synthesis (main process involving "expensive" setup or apparatus)                                                                                                                                                                                  | 12               | 68                                | 3000                                                                                                                                                                                         | 24,65 €                                      | 65000                                              | 502,27 €                                               | Ablation in the fluid system (laser 50000€, computer, driving system+optics+peristaltic pump + laser security 15000€) |
| Post-treatment and purification                                                                                                                                                                                                                    | 4                | 16                                | 1880                                                                                                                                                                                         | 3,63 €                                       | 8900                                               | 16,18 €                                                | Rotovap (Bath+motor 1200W, Pump 30W, Chiller 650W)                                                                    |
| Post-treatment and purification                                                                                                                                                                                                                    | 0,25             | 10                                | 1000                                                                                                                                                                                         | 1,21 €                                       | 2000                                               | 2,27 €                                                 | drying (Oven 1000W), one night                                                                                        |
| Labor:                                                                                                                                                                                                                                             | 450,84 €         |                                   | Electricity:                                                                                                                                                                                 | 42,54 €                                      | Depreciation:                                      | 564,36 €                                               |                                                                                                                       |
|                                                                                                                                                                                                                                                    |                  |                                   | VAT excluded                                                                                                                                                                                 |                                              | VAT excluded                                       |                                                        |                                                                                                                       |
| Total chemicals, energy, consumables                                                                                                                                                                                                               | 84,48 €          |                                   |                                                                                                                                                                                              |                                              |                                                    |                                                        |                                                                                                                       |
| Rental cost of the facilities                                                                                                                                                                                                                      | 872,73 €         |                                   |                                                                                                                                                                                              |                                              |                                                    |                                                        |                                                                                                                       |
| Production cost per gram, VAT excluded                                                                                                                                                                                                             | 986,21 €         | \$1 084,83                        | Not included: press for target preparation (Marginal), R&D, quality control                                                                                                                  |                                              |                                                    |                                                        |                                                                                                                       |
| Post-annealing                                                                                                                                                                                                                                     |                  | 0                                 | 4                                                                                                                                                                                            | 4500                                         | 2,18 €                                             | 16000                                                  | 7,27 €                                                                                                                |
| Production cost per gram, including post-annealing VAT excluded                                                                                                                                                                                    | 990,93 €         | \$1 090,02                        |                                                                                                                                                                                              |                                              |                                                    |                                                        |                                                                                                                       |

| Info Water purification (18MΩ) |                 | Price, one Kit                | Volume produced, one kit [L] | Volume used for on batch | Costs        |
|--------------------------------|-----------------|-------------------------------|------------------------------|--------------------------|--------------|
| PREtreatment SMART2PURE Kit    |                 | 293,91                        | 1800                         | 20,4                     | 3,33098      |
| ULTRA PURE Water KIT           |                 | 372,69                        | 4000                         | 20,4                     | 1,900719     |
|                                | flow rate (L/H) | volume used for one batch [L] | Production time [H]          | Smart2Pure System        | Depreciation |
| Smart2Pure system (6L/H)       |                 | 6                             | 20,4                         | 3,4                      | 2764,5       |
|                                |                 |                               |                              |                          | 1,068102273  |
|                                |                 |                               | Total cost water             |                          | 6,299801273  |

|                                                                                                                                                                                                                                                                                                                                                                                                                                                                                                                                                                                                                                                                                                                                                                                                                                                                                                                                                                                                                                                                                                                                                 |                                                                   |          |                                                                                          |       |                                                 |      |                                                                                                                               |    |
|-------------------------------------------------------------------------------------------------------------------------------------------------------------------------------------------------------------------------------------------------------------------------------------------------------------------------------------------------------------------------------------------------------------------------------------------------------------------------------------------------------------------------------------------------------------------------------------------------------------------------------------------------------------------------------------------------------------------------------------------------------------------------------------------------------------------------------------------------------------------------------------------------------------------------------------------------------------------------------------------------------------------------------------------------------------------------------------------------------------------------------------------------|-------------------------------------------------------------------|----------|------------------------------------------------------------------------------------------|-------|-------------------------------------------------|------|-------------------------------------------------------------------------------------------------------------------------------|----|
| <p><b>The following table is a tool developed to assess the production costs of one production batch of nanoparticles, and then infer the production costs for 1g of dried nanoparticles</b></p> <p>The time duration to produce one batch is an important parameter since it will defined the manpower costs, as well as equipment depreciation. We assume <b>5 years for the depreciation of the investments (standard value)</b></p> <p>In the following table, the time duration is divided in two parts: (i) the working time of a technician (Manpower) and (ii) the equipment operating times. The manpower is used to compute the salary cost, the equipment operating times is used to compute the depreciation of the investments (equipments) and the electricity costs. Moreover, an immobilisation of the equipment is used to compute the rental cost of the facilities</p> <p><b>Rental of facilities:</b> 30 m<sup>2</sup> of experimental room including a fume hood, an office of 10 m<sup>2</sup>, the rental expenses (processing of the chemical waste, fluids consumption, cleaning and security, air conditionning).</p> | Hourly costs of a qualified technicians including taxes [€/hours] | 26,14 €  | Wage bill (Annually) including taxes for a French qualified technician, median value [€] | 42000 | Legal working time per years [hours]            | 1607 | For the sake of comparing the different methods, we will use the same hourly costs for all the synthesis (i.e. french values) |    |
|                                                                                                                                                                                                                                                                                                                                                                                                                                                                                                                                                                                                                                                                                                                                                                                                                                                                                                                                                                                                                                                                                                                                                 | Electricity cost (France, VAT excluded) [€ / kWh]                 | 0,12 €   |                                                                                          |       |                                                 |      |                                                                                                                               |    |
|                                                                                                                                                                                                                                                                                                                                                                                                                                                                                                                                                                                                                                                                                                                                                                                                                                                                                                                                                                                                                                                                                                                                                 | Usefull Machine time on 5 years (for depreciation) [hours]        | 8800     | Deprecisation period [year]                                                              | 5     | Working weeks in a year                         | 44   | Machine time per week [Hours]                                                                                                 | 40 |
|                                                                                                                                                                                                                                                                                                                                                                                                                                                                                                                                                                                                                                                                                                                                                                                                                                                                                                                                                                                                                                                                                                                                                 | Rental cost per working day [€/day]                               | 109,09 € | Facilities rental [€/years]                                                              | 24000 | Working days in a year = Working Weeks x 5 Days |      | 220                                                                                                                           |    |

| Photochemistry                                                                                                                                                                                                                                            |                  |                                   | Comments                                                                                                                                                                                     |                                              |                                                    |                                                        |                                                    |
|-----------------------------------------------------------------------------------------------------------------------------------------------------------------------------------------------------------------------------------------------------------|------------------|-----------------------------------|----------------------------------------------------------------------------------------------------------------------------------------------------------------------------------------------|----------------------------------------------|----------------------------------------------------|--------------------------------------------------------|----------------------------------------------------|
| Productivity, i.e. weight in grams of dried powder produced in one batch                                                                                                                                                                                  | 26,2             | [g/batch]                         | 18MΩ water produced with a purification units<br><br>Pilot plant synthesis and whashing time of the pilot plant<br><br>173.68 g of cerium nitrate hexahydrate + 504.48 g of ammonium formate |                                              |                                                    |                                                        |                                                    |
| Volume of purified water (18MΩ) used to produce one batch                                                                                                                                                                                                 | 80               | [L]                               |                                                                                                                                                                                              |                                              |                                                    |                                                        |                                                    |
| Immobilisation of the equipments for one batch                                                                                                                                                                                                            | 2                | [Days]                            |                                                                                                                                                                                              |                                              |                                                    |                                                        |                                                    |
| Product costs for one batch (chemicals...)                                                                                                                                                                                                                | 90,27 €          | [€] VAT excluded                  |                                                                                                                                                                                              |                                              |                                                    |                                                        |                                                    |
| Consumable (chemicals excluded)                                                                                                                                                                                                                           | 1,20 €           |                                   |                                                                                                                                                                                              |                                              |                                                    |                                                        |                                                    |
| <b>Time duration:</b> Manpower (time spent by an researcher/technician) and machine time are separated. As an exemple, for PLAL, the target preparation involves 1H of work for the pellet preparation, even if the time duration of the annealing is 24H | Manpower [Hours] | Equipment operating times [Hours] | Power consumption of the machines [W]                                                                                                                                                        | Electricity costs per batch [€] VAT excluded | Investment Cost of the equipments [€] VAT excluded | Equipments depreciation for one batch [€] VAT excluded | Comments                                           |
| Synthesis preparation                                                                                                                                                                                                                                     | 0,5              | 0,5                               | 40                                                                                                                                                                                           | 0,00 €                                       | 248,5                                              | 0,01 €                                                 | Photochemical plant purchase and installation cost |
| Synthesis (main process involving "expensive" setup or apparatus)                                                                                                                                                                                         | 2                | 26                                | 2732                                                                                                                                                                                         | 8,58 €                                       | 30000                                              | 88,64 €                                                |                                                    |
| Post-treatment and purification                                                                                                                                                                                                                           | 2                | 2                                 | 600                                                                                                                                                                                          | 0,15 €                                       | 2464                                               | 0,56 €                                                 |                                                    |
| Post-treatment and purification                                                                                                                                                                                                                           | 0,25             | 10                                | 1000                                                                                                                                                                                         | 1,21 €                                       | 2000                                               | 2,27 €                                                 |                                                    |
| Labor:                                                                                                                                                                                                                                                    | 124,14 €         |                                   | Electricity:                                                                                                                                                                                 | 9,94 €                                       | Depreciation:                                      | 91,48 €                                                | drying (Oven 1000W), one night                     |
|                                                                                                                                                                                                                                                           |                  |                                   | VAT excluded                                                                                                                                                                                 |                                              | VAT excluded                                       |                                                        |                                                    |
| Total chemicals, energy, consumables                                                                                                                                                                                                                      | 126,12 €         |                                   |                                                                                                                                                                                              |                                              |                                                    |                                                        |                                                    |
| Rental cost of the facilities                                                                                                                                                                                                                             | 218,18 €         |                                   |                                                                                                                                                                                              |                                              |                                                    |                                                        |                                                    |
| Production cost per gram, VAT excluded                                                                                                                                                                                                                    | 21,37 €          | \$23,51                           | Not included: press for target preparation (Marginal), R&D, quality control ...                                                                                                              |                                              |                                                    |                                                        |                                                    |
| Post-annealing                                                                                                                                                                                                                                            |                  | 0                                 | 4                                                                                                                                                                                            | 4500                                         | 2,18 €                                             | 16000                                                  | 7,27 €                                             |
| Production cost per gram, including post-annealing VAT excluded                                                                                                                                                                                           | 21,73 €          | \$23,90                           |                                                                                                                                                                                              |                                              |                                                    |                                                        |                                                    |

|                                                                                                                                                                                                                                                                                                                                                                                                                                                                                                                                                                                                                                                                                                                                                                                                                                                                                                                                                                                                                                                                                                                                                 |                                                                   |          |                                                                                          |       |                                                 |      |                                                                                                                               |    |
|-------------------------------------------------------------------------------------------------------------------------------------------------------------------------------------------------------------------------------------------------------------------------------------------------------------------------------------------------------------------------------------------------------------------------------------------------------------------------------------------------------------------------------------------------------------------------------------------------------------------------------------------------------------------------------------------------------------------------------------------------------------------------------------------------------------------------------------------------------------------------------------------------------------------------------------------------------------------------------------------------------------------------------------------------------------------------------------------------------------------------------------------------|-------------------------------------------------------------------|----------|------------------------------------------------------------------------------------------|-------|-------------------------------------------------|------|-------------------------------------------------------------------------------------------------------------------------------|----|
| <p><b>The following table is a tool developed to assess the production costs of one production batch of nanoparticles, and then infer the production costs for 1g of dried nanoparticles</b></p> <p>The time duration to produce one batch is an important parameter since it will defined the manpower costs, as well as equipment depreciation. We assume <b>5 years for the depreciation of the investments (standard value)</b></p> <p>In the following table, the time duration is divided in two parts: (i) the working time of a technician (Manpower) and (ii) the equipment operating times. The manpower is used to compute the salary cost, the equipment operating times is used to compute the depreciation of the investments (equipments) and the electricity costs. Moreover, an immobilisation of the equipment is used to compute the rental cost of the facilities</p> <p><b>Rental of facilities:</b> 30 m<sup>2</sup> of experimental room including a fume hood, an office of 10 m<sup>2</sup>, the rental expenses (processing of the chemical waste, fluids consumption, cleaning and security, air conditionning).</p> | Hourly costs of a qualified technicians including taxes [€/hours] | 26,14 €  | Wage bill (Annually) including taxes for a French qualified technician, median value [€] | 42000 | Legal working time per years [hours]            | 1607 | For the sake of comparing the different methods, we will use the same hourly costs for all the synthesis (i.e. french values) |    |
|                                                                                                                                                                                                                                                                                                                                                                                                                                                                                                                                                                                                                                                                                                                                                                                                                                                                                                                                                                                                                                                                                                                                                 | Electricity cost (France, VAT excluded) [€ / kWh]                 | 0,12 €   |                                                                                          |       |                                                 |      |                                                                                                                               |    |
|                                                                                                                                                                                                                                                                                                                                                                                                                                                                                                                                                                                                                                                                                                                                                                                                                                                                                                                                                                                                                                                                                                                                                 | Usefull Machine time on 5 years (for depreciation) [hours]        | 8800     | Deprecisation period [year]                                                              | 5     | Working weeks in a year                         | 44   | Machine time per week [Hours]                                                                                                 | 40 |
|                                                                                                                                                                                                                                                                                                                                                                                                                                                                                                                                                                                                                                                                                                                                                                                                                                                                                                                                                                                                                                                                                                                                                 | Rental cost per working day [€/day]                               | 109,09 € | Facilities rental [€/years]                                                              | 24000 | Working days in a year = Working Weeks x 5 Days |      | 220                                                                                                                           |    |

| Hydrothermal - nanorods                                                                                                                                                                                                                                   |                  |                                   | Comments                                                                                                                  |                                              |                                                    |                                                        |                                     |
|-----------------------------------------------------------------------------------------------------------------------------------------------------------------------------------------------------------------------------------------------------------|------------------|-----------------------------------|---------------------------------------------------------------------------------------------------------------------------|----------------------------------------------|----------------------------------------------------|--------------------------------------------------------|-------------------------------------|
| Productivity, i.e. weight in grams of dried powder produced in one batch                                                                                                                                                                                  | 31               | [g/batch]                         | Autoclave: synthesis duration + warming/cooling time (cooling 12h@100°C)<br><br>Ce(NO3)3.6H2O : 265€/1kg; NaOH: 286€/10kg |                                              |                                                    |                                                        |                                     |
| Volume of purified water (18MΩ) used to produce one batch                                                                                                                                                                                                 | 7                | [L]                               |                                                                                                                           |                                              |                                                    |                                                        |                                     |
| Immobilisation of the equipments for one batch                                                                                                                                                                                                            | 2                | [Days]                            |                                                                                                                           |                                              |                                                    |                                                        |                                     |
| Product costs for one batch (chemicals...)                                                                                                                                                                                                                | 46,20 €          | [€] VAT excluded                  |                                                                                                                           |                                              |                                                    |                                                        |                                     |
| Consumable (chemicals excluded)                                                                                                                                                                                                                           | 0,00 €           |                                   |                                                                                                                           |                                              |                                                    |                                                        |                                     |
| <b>Time duration:</b> Manpower (time spent by an researcher/technician) and machine time are separated. As an exemple, for PLAL, the target preparation involves 1H of work for the pellet preparation, even if the time duration of the annealing is 24H | Manpower [Hours] | Equipment operating times [Hours] | Power consumption of the machines [W]                                                                                     | Electricity costs per batch [€] VAT excluded | Investment Cost of the equipments [€] VAT excluded | Equipments depreciation for one batch [€] VAT excluded | Comments                            |
| Synthesis preparation                                                                                                                                                                                                                                     | 1                | 1                                 | 20                                                                                                                        | 0,00 €                                       | 1070                                               | 0,12 €                                                 | Balance (520€); stirrer (20W, 550€) |
| Synthesis (main process involving "expensive" setup or apparatus)                                                                                                                                                                                         | 0,5              | 7                                 | 3000                                                                                                                      | 2,54 €                                       | 37499                                              | 29,83 €                                                | Autoclave                           |
| cooling of the autoclave                                                                                                                                                                                                                                  | 0                | 12                                | 0                                                                                                                         | 0,00 €                                       | 37499                                              | 51,14 €                                                | Autoclave                           |
| Post-treatment and purification                                                                                                                                                                                                                           | 1,5              | 1,5                               | 4600                                                                                                                      | 0,83 €                                       | 25000                                              | 4,26 €                                                 | Washing / centrifugation            |
| Post-treatment and purification                                                                                                                                                                                                                           | 0,25             | 10                                | 1000                                                                                                                      | 1,21 €                                       | 2000                                               | 2,27 €                                                 | Drying                              |
| Labor:                                                                                                                                                                                                                                                    | 84,94 €          |                                   | Electricity:                                                                                                              | 4,58 €                                       | Depreciation:                                      | 87,62 €                                                |                                     |
|                                                                                                                                                                                                                                                           |                  |                                   | VAT excluded                                                                                                              |                                              | VAT excluded                                       |                                                        |                                     |
| Total chemicals, energy, consumables                                                                                                                                                                                                                      | 52,94 €          |                                   |                                                                                                                           |                                              |                                                    |                                                        |                                     |
| Rental cost of the facilities                                                                                                                                                                                                                             | 218,18 €         |                                   |                                                                                                                           |                                              |                                                    |                                                        |                                     |

|                                        |         |         |                                                                                 |  |  |  |
|----------------------------------------|---------|---------|---------------------------------------------------------------------------------|--|--|--|
| Production cost per gram, VAT excluded | 14,31 € | \$15,74 | Not included: press for target preparation (Marginal), R&D, quality control ... |  |  |  |
|----------------------------------------|---------|---------|---------------------------------------------------------------------------------|--|--|--|

|                                                                 |         |         |      |        |       |        |
|-----------------------------------------------------------------|---------|---------|------|--------|-------|--------|
| Post-annealing                                                  | 0       | 4       | 4500 | 2,18 € | 16000 | 7,27 € |
| Production cost per gram, including post-annealing VAT excluded | 14,62 € | \$16,08 |      |        |       |        |

|                                                                                                                                                                                                                                                                                                                                                                                                                                                                                                                                                                                                                                                                                                                                                                                                                                                                                                                                                                                                                                                                                                                                                |                                                                   |          |                                                                                          |       |                                                 |      |                                                                                                                               |    |
|------------------------------------------------------------------------------------------------------------------------------------------------------------------------------------------------------------------------------------------------------------------------------------------------------------------------------------------------------------------------------------------------------------------------------------------------------------------------------------------------------------------------------------------------------------------------------------------------------------------------------------------------------------------------------------------------------------------------------------------------------------------------------------------------------------------------------------------------------------------------------------------------------------------------------------------------------------------------------------------------------------------------------------------------------------------------------------------------------------------------------------------------|-------------------------------------------------------------------|----------|------------------------------------------------------------------------------------------|-------|-------------------------------------------------|------|-------------------------------------------------------------------------------------------------------------------------------|----|
| <p><b>The following table is a tool developed to assess the production costs of one production batch of nanoparticles, and then infer the production costs for 1g of dried nanoparticles</b></p> <p>The time duration to produce one batch is an important parameter since it will defined the manpower costs, as well as equipment depreciation. We assume <b>5 years for the depreciation of the investments (standard value)</b></p> <p>In the following table, the time duration is divided in two parts: (i) the working time of a technician (Manpower) and (ii) the equipment operating times. The manpower is used to compute the salary cost, the equipment operating times is used to compute the depreciation of the investments (equipments) and the electricity costs. Moreover, an immobilisation of the equipment is used to compute the rental cost of the facilities</p> <p><b>Rental of facilities:</b> 30 m<sup>2</sup> of experimental room including a fume hood, an office of 10 m<sup>2</sup>, the rental expenses (processing of the chemical waste, fluids consumption, cleaning and security, air conditioning).</p> | Hourly costs of a qualified technicians including taxes [€/hours] | 26,14 €  | Wage bill (Annually) including taxes for a French qualified technician, median value [€] | 42000 | Legal working time per years [hours]            | 1607 | For the sake of comparing the different methods, we will use the same hourly costs for all the synthesis (i.e. french values) |    |
|                                                                                                                                                                                                                                                                                                                                                                                                                                                                                                                                                                                                                                                                                                                                                                                                                                                                                                                                                                                                                                                                                                                                                | Electricity cost (France, VAT excluded) [€ / kWh]                 | 0,12 €   |                                                                                          |       |                                                 |      |                                                                                                                               |    |
|                                                                                                                                                                                                                                                                                                                                                                                                                                                                                                                                                                                                                                                                                                                                                                                                                                                                                                                                                                                                                                                                                                                                                | Usefull Machine time on 5 years (for depreciation) [hours]        | 8800     | Deprecisation period [year]                                                              | 5     | Working weeks in a year                         | 44   | Machine time per week [Hours]                                                                                                 | 40 |
|                                                                                                                                                                                                                                                                                                                                                                                                                                                                                                                                                                                                                                                                                                                                                                                                                                                                                                                                                                                                                                                                                                                                                | Rental cost per working day [€/day]                               | 109,09 € | Facilities rental [€/years]                                                              | 24000 | Working days in a year = Working Weeks x 5 Days |      | 220                                                                                                                           |    |

| Hydrothermal - nano-octahedra                                                                                                                                                                                                                             |                         |                                          | Comments                                                                                                                     |                                                     |                                                           |                                                               |                                     |             |
|-----------------------------------------------------------------------------------------------------------------------------------------------------------------------------------------------------------------------------------------------------------|-------------------------|------------------------------------------|------------------------------------------------------------------------------------------------------------------------------|-----------------------------------------------------|-----------------------------------------------------------|---------------------------------------------------------------|-------------------------------------|-------------|
| Productivity, i.e. weight in grams of dried powder produced in one batch                                                                                                                                                                                  | 103                     | [g/batch]                                | Autoclave: synthesis duration + warming/cooling time (cooling 15h@180°C)<br><br>Ce(NO3)3.6H2O : 265€/1kg; NH4OH : 33,9€/2,5L |                                                     |                                                           |                                                               |                                     |             |
| Volume of purified water (18MQ) used to produce one batch                                                                                                                                                                                                 | 7                       | [L]                                      |                                                                                                                              |                                                     |                                                           |                                                               | Purification cost [€/L]             | 0,308813788 |
| Immobilisation of the equipments for one batch                                                                                                                                                                                                            | 3                       | [Days]                                   |                                                                                                                              |                                                     |                                                           |                                                               |                                     |             |
| Product costs for one batch (chemicals...)                                                                                                                                                                                                                | 74,00 €                 | [€] VAT excluded                         |                                                                                                                              |                                                     |                                                           |                                                               |                                     |             |
| Consumable (chemicals excluded)                                                                                                                                                                                                                           | 0,00 €                  |                                          |                                                                                                                              |                                                     |                                                           |                                                               |                                     |             |
| <b>Time duration:</b> Manpower (time spent by an researcher/technician) and machine time are separated. As an exemple, for PLAL, the target preparation involves 1H of work for the pellet preparation, even if the time duration of the annealing is 24H | <b>Manpower [Hours]</b> | <b>Equipment operating times [Hours]</b> | <b>Power consumption of the machines [W]</b>                                                                                 | <b>Electricity costs per batch [€] VAT excluded</b> | <b>Investment Cost of the equipments [€] VAT excluded</b> | <b>Equipments depreciation for one batch [€] VAT excluded</b> | <b>Comments</b>                     |             |
| Synthesis preparation                                                                                                                                                                                                                                     | 1                       | 1                                        | 20                                                                                                                           | 0,00 €                                              | 1070                                                      | 0,12 €                                                        | Balance (520€); stirrer (20W, 550€) |             |
| Synthesis (main process involving "expensive" setup or apparatus)                                                                                                                                                                                         | 0,5                     | 26                                       | 3000                                                                                                                         | 9,43 €                                              | 37499                                                     | 110,79 €                                                      |                                     |             |
| cooling of the autoclave                                                                                                                                                                                                                                  | 0                       | 15                                       | 0                                                                                                                            | 0,00 €                                              | 37499                                                     | 63,92 €                                                       | Autoclave                           |             |
| Post-treatment and purification                                                                                                                                                                                                                           | 1,5                     | 1,5                                      | 4600                                                                                                                         | 0,83 €                                              | 25000                                                     | 4,26 €                                                        | Washing / centrifugation            |             |
| Post-treatment and purification                                                                                                                                                                                                                           | 0,25                    | 10                                       | 1000                                                                                                                         | 1,21 €                                              | 2000                                                      | 2,27 €                                                        | Drying                              |             |
| Labor:                                                                                                                                                                                                                                                    | 84,94 €                 |                                          | Electricity:                                                                                                                 | 11,47 €                                             | Depreciation:                                             | 181,37 €                                                      |                                     |             |
|                                                                                                                                                                                                                                                           |                         |                                          | VAT excluded                                                                                                                 |                                                     | VAT excluded                                              |                                                               |                                     |             |
| Total chemicals, energy, consumables                                                                                                                                                                                                                      | 87,63 €                 |                                          |                                                                                                                              |                                                     |                                                           |                                                               |                                     |             |
| Rental cost of the facilities                                                                                                                                                                                                                             | 327,27 €                |                                          |                                                                                                                              |                                                     |                                                           |                                                               |                                     |             |
|                                                                                                                                                                                                                                                           |                         |                                          |                                                                                                                              |                                                     |                                                           |                                                               |                                     |             |
| Production cost per gram, VAT excluded                                                                                                                                                                                                                    | 6,61 €                  | \$7,28                                   | Not included: press for target preparation (Marginal), R&D, quality control ...                                              |                                                     |                                                           |                                                               |                                     |             |
|                                                                                                                                                                                                                                                           |                         |                                          |                                                                                                                              |                                                     |                                                           |                                                               |                                     |             |
| Post-annealing                                                                                                                                                                                                                                            |                         | 0                                        | 4                                                                                                                            | 4500                                                | 2,18 €                                                    | 16000                                                         | 7,27 €                              |             |
| Production cost per gram, including post-annealing VAT excluded                                                                                                                                                                                           | 6,71 €                  | \$7,38                                   |                                                                                                                              |                                                     |                                                           |                                                               |                                     |             |
