# Supplementary material for: Synthesis routes of CeO2 nanoparticles dedicated to organophosphorus degradation: a benchmark
Source: Royal Society of Chemistry journal article supplement (doi:10.1039/c9ce01898k), 2020-01-01
Supplement: c9ce01898k2.pdf [file c9ce01898k2.pdf]

## Electronic Supplementary Information

### Synthesis routes of CeO<sub>2</sub> nanoparticles dedicated to organophosphorus degradation : a benchmark

Isabelle Trenque<sup>†,a,b,c</sup>, Greta Camilla Magnano<sup>†,a</sup>, Jan Bárta<sup>†,e,f</sup>, Frédéric Chaput<sup>c</sup>, Marie Alexandrine Bolzinger<sup>a</sup>, Isabelle Pitault<sup>a</sup>, Stéphanie Briançon<sup>a</sup>, Karine Masenelli-Varlot<sup>d</sup>, Matthieu Bugnet<sup>d</sup>, Václav Čuba<sup>e</sup>, David Amans<sup>#,b</sup>

a. LAGEPP, UCBL, CNRS UMR5007, F-69622, Villeurbanne, France.

b. ILM, UCBL, CNRS UMR5306, F-69622, Villeurbanne, France.

c. Ecole Normale Supérieure de Lyon, Laboratoire de Chimie, CNRS UMR5182, F-69634, Lyon, France.

d. Univ Lyon, INSA-Lyon, UCBL, MATEIS, UMR CNRS 5510, F-69621, Villeurbanne, France.

e. Czech Technical University in Prague, Faculty of Nuclear Sciences and Physical Engineering, Břehová 7, Prague 1, Czech Republic

f. Academy of Sciences of the Czech Republic, Institute of Physics, Cukrovarnická 10, Prague 6, Czech Republic

# david.amans@univ-lyon1.fr

† contributed equally to the experiment

#### 1) Production yield of the Photochemical (Xhv) method

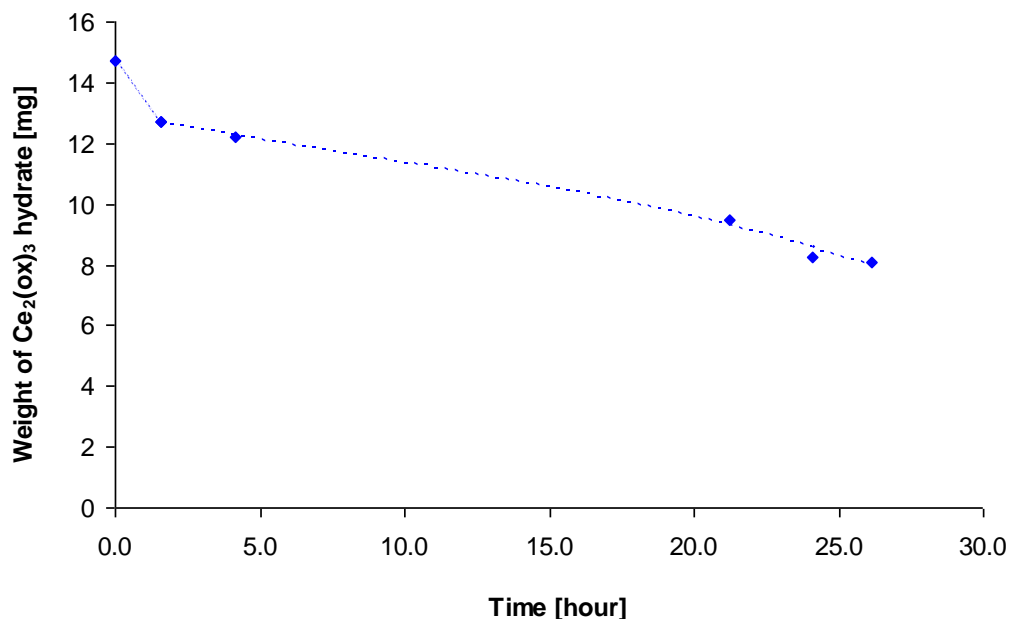

Figure S1: Weight of cerium oxalate hydrate measured in 8 mL samples from the large-scale synthesis as a function of the reaction time. The cerium oxalate hydrate corresponds to the unreacted Ce<sup>3+</sup> ions.

Figure S1 shows the evolution of the weight of cerium oxalate hydrate measured in 8 mL samples from the large-scale synthesis as a function of the reaction time. The cerium oxalate hydrate is formed from the unreacted  $\text{Ce}^{3+}$  ions. The  $\text{Ce}^{3+}$  concentration decreases very slowly. The slow kinetics is probably due to the absorption of the UV light by the formed particles which lowers the amount of light available for the photochemical reactions. From the time evolution of the cerium oxalate hydrate weight displayed in Figure S1, we can deduce that the preparation yield of  $\text{CeO}_2$  is 38% after 26 hours (the ratio between the final and the initial weight of cerium oxalate hydrate is 62%).

## 2) Volume weighted size distribution of the $\Phi$ -NPO sample

The particle size distribution is measured with a Mastersizer 3000 from Malvern based on the technique of laser diffraction. A droplet of the pristine solution is injected in the flow system and the Mie scattering

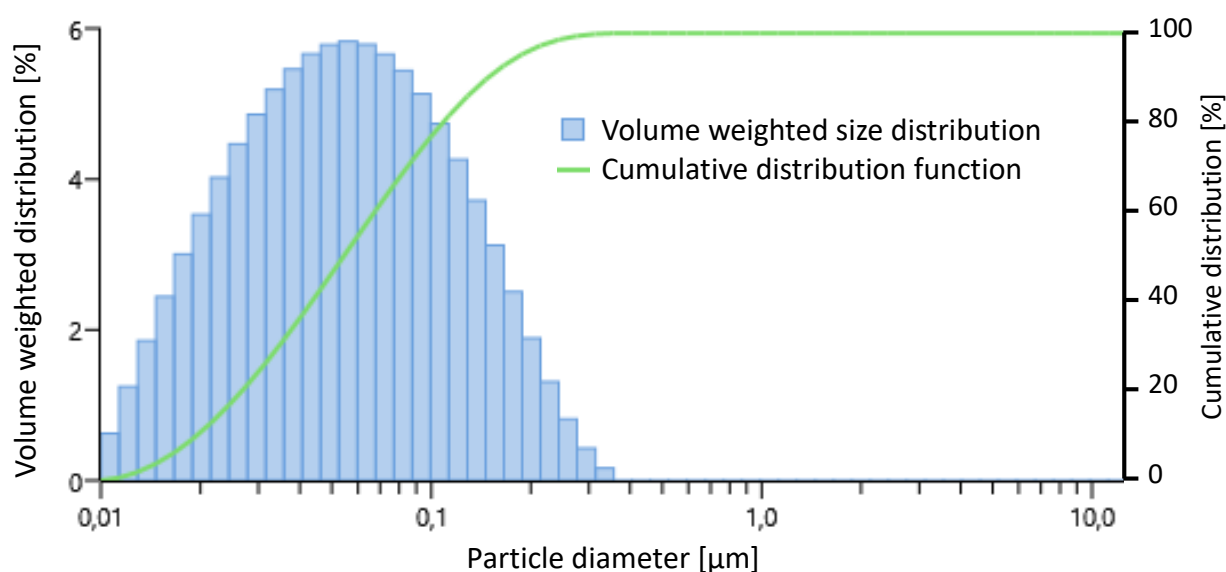

Figure S2: Volume weighted size distribution of the  $\Phi$ -NPO sample and the corresponding cumulative distribution function

model was used. Figure S2 shows the volume weighted size distribution delivered by the Mastersizer 3000 particle size analyzer, as well as the cumulative distribution function. 10% (volume percent) of the particles have a diameter below 19.5 nm, 50% below 54.7 nm, and 90% below 154 nm. The distribution is consistent with the sizes observed on the HRTEM images (Figure 2A) from a few nanometers to a few hundred nanometers.

### 3) TEM and HRTEM images of the CeO<sub>2</sub> nanoparticles after annealing

Figure S3 shows TEM and HRTEM images of the samples annealed in air at 500°C for two hours.

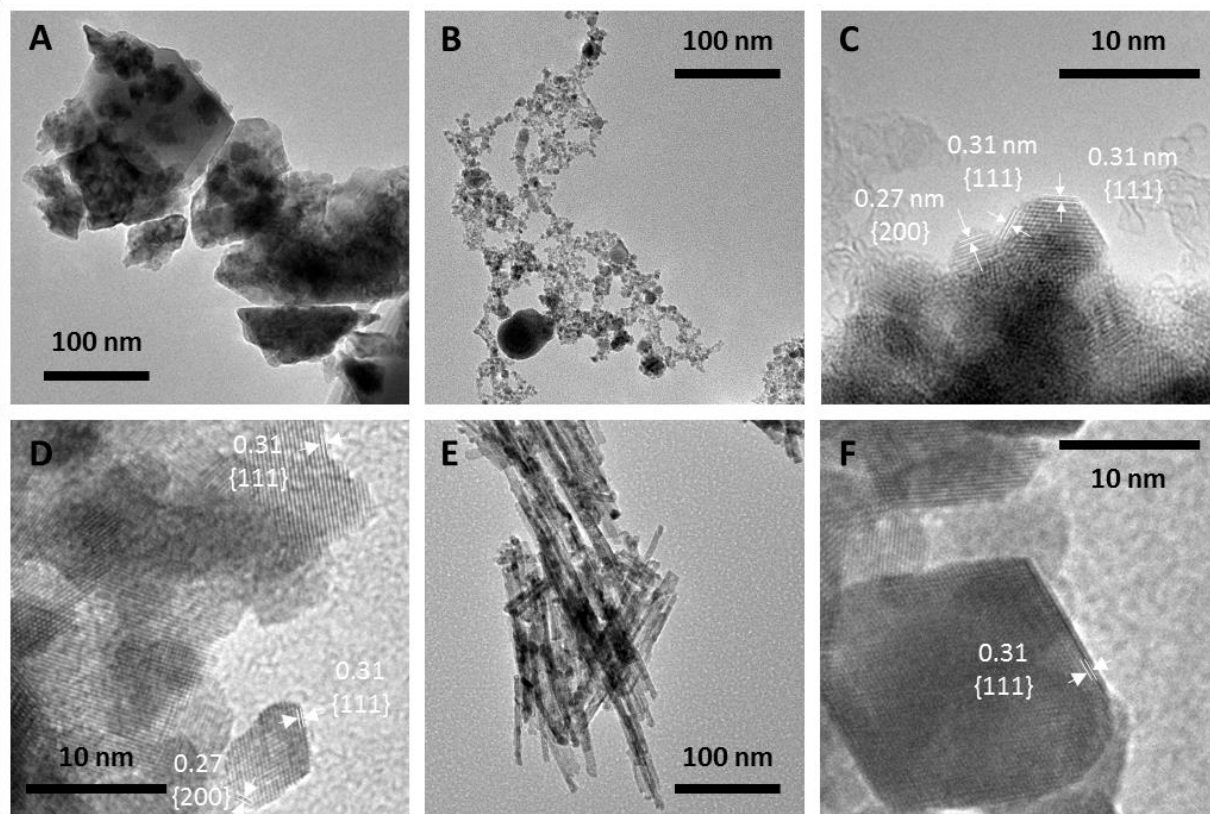

Figure S3: Bright field TEM and HRTEM images of the samples after the annealing treatment. (A) Commercial nanopolyhedra  $\Phi$ -NPO\*. (B,C) Nanotruncated octahedra synthesized by PLAL  $\Phi$ -NTO\*. (D) Nanotruncated octahedra elaborated by photochemistry Xhv-NTO\*. (E) nanorods X-NR\* and (F) nanooctahedra X-NO\* elaborated by hydrothermal process.

#### 4) Raman spectra

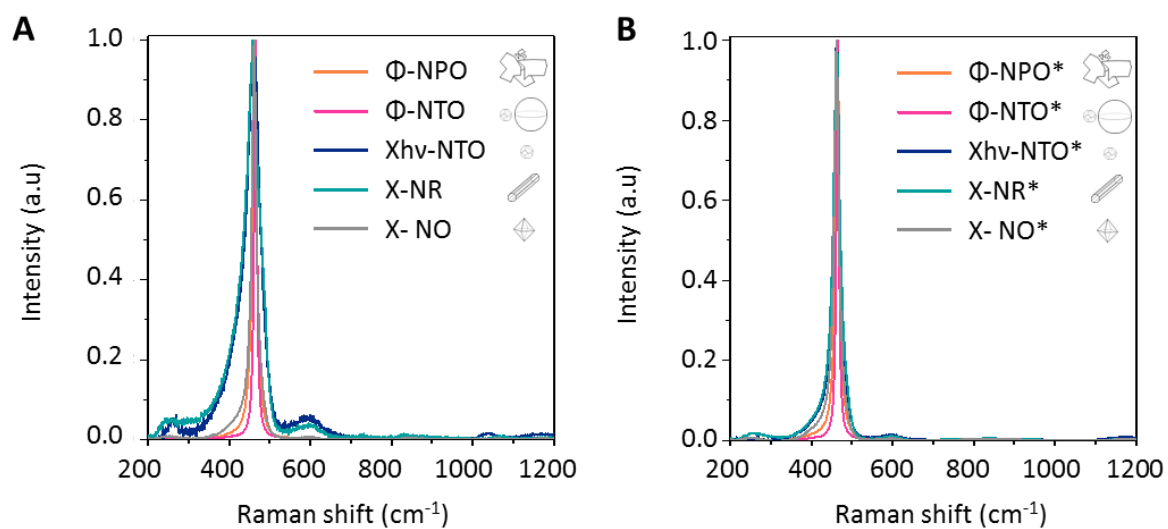

Figure S4: Raman spectra of the cerium oxide nanoparticles before (A) and after (B) the annealing treatment in the 200-1200  $\text{cm}^{-1}$  range ( $\lambda_{\text{exc}} = 633 \text{ nm}$ ). All spectra are normalized relative to the maximum intensity of the  $F_{2g}$  mode of the  $\text{CeO}_2$  fluorite phase.

## 5) Infrared spectroscopy

| Species                                                             | Peak wavenumber (cm <sup>-1</sup> ) |          |                                 |                   |                   | Vibration mode                                   |
|---------------------------------------------------------------------|-------------------------------------|----------|---------------------------------|-------------------|-------------------|--------------------------------------------------|
|                                                                     | Φ-NPO                               | Φ-NTO    | Xhv-NTO                         | X-NR              | X-NO              |                                                  |
| adsorbed water or –OH group                                         | ~ 3400                              |          | ~3200                           | ~ 3400            | ~ 3400            | v(OH)                                            |
| Formate or ligand                                                   | 2959(sh), 2922, 2857, 2849(sh)      |          | 2842                            |                   |                   | v(CH)                                            |
| adsorbed water or –OH group                                         | 1630                                |          | 1630(sh)                        | 1639              | 1631              | δ(OH)                                            |
| Carboxylate ions R-CO <sub>2</sub> <sup>-</sup> (formate or ligand) | 1538, 1457, 1406, 1337(sh)          |          | 1553, 1467 (sh), 1377(sh), 1352 |                   |                   | vas(OCO) and vs(OCO)                             |
| Carbonate                                                           |                                     |          |                                 | 1540, 1330        | 1540, 1330        | v(CO)                                            |
| Hydrogen carbonate HO-COO <sup>-</sup>                              |                                     | 1262     |                                 |                   |                   | δ(COH)                                           |
| Hydrogen carbonate HO-COO <sup>-</sup>                              |                                     | 1100     |                                 |                   |                   | v(CO)                                            |
| carbonate                                                           | 1068                                | 1020(sh) | 1058                            | 1050              | 1050              | v(CO)                                            |
| carbonate                                                           | 842(sh), 712                        | 802, 715 | 833, 753                        | 847, 715(sh), 667 | 850, 714(sh), 666 | δout(CO <sub>3</sub> ) and δin(CO <sub>3</sub> ) |
| cerium oxide                                                        | < 600                               | < 600    | < 600                           | < 600             | < 600             | v(Ce-O)                                          |

**Table S1** – Assignment of absorbance peaks observed in FTIR spectra for the as-produced samples, before annealing. Symbol v and δ represent the stretching vibration and the bending vibration respectively. δ<sub>out</sub> names a bending out-of-plan, δ<sub>in</sub> a bending in-plane, vas an asymmetric stretching, and vs a symmetric bending. The annotation (sh) means that the corresponding vibration mode is marked by a shoulder.

6) **Costs**

The Excel file costs.xlsx gathers all the information regarding the cost assessments as well as the productivity.
